# Supplementary material
Source: MDPI journal article supplement (https://www.mdpi.com/2073-4441/11/11/2379)
Supplement: s1 [file s1]

# Effects of a Large Irrigation Reservoir on Aquatic and Riparian Plants: A History of Survival and Loss

**Table S1.** Results of chi-square homogeneity tests across functional plant groups were compared between the two periods (pre- and post-dam) and for the three zones (UP=upstream of dam, RES=reservoir; Down=downstream of dam). Number of species and proportions of species are shown. Physiognomy: "Hann"=herbaceous annual, "Hper"= Herbaceous perennial, "Wshr"= shrubs and lianas; "Wtre"= trees; Origin/disturbance: "End"=endemic, "Exo"= exotic, "Nat"= native, "Nrud"= Native ruderal; Hydrophily: "Hel"= helophytes; "Hyd"=hydrophytes, "Hyg"=Hygrophytes, "Ter"=terrestrial.

|              |            | UP (p.value=0.6149) |           |         |            | RES (p.value=0.674) |           |         |            | DOWN (p.value=0.436) |           |         |  |
|--------------|------------|---------------------|-----------|---------|------------|---------------------|-----------|---------|------------|----------------------|-----------|---------|--|
|              |            | Pre                 |           | Post    |            | Pre                 |           | Post    |            | Pre                  |           | Post    |  |
| <b>Hann</b>  | 47         | (39.5%)             | 35        | (37.6%) | 53         | (46.5%)             | 35        | (51.5%) | 44         | (39.6%)              | 32        | (34.4%) |  |
| <b>Hper</b>  | 60         | (50.4%)             | 43        | (46.2%) | 50         | (43.9%)             | 29        | (42.6%) | 59         | (53.2%)              | 48        | (51.6%) |  |
| <b>Wshr</b>  | 7          | (5.9%)              | 8         | (8.6%)  | 8          | (7%)                | 2         | (2.9%)  | 6          | (5.4%)               | 9         | (9.7%)  |  |
| <b>Wtre</b>  | 5          | (4.2%)              | 7         | (7.5%)  | 3          | (2.6%)              | 2         | (2.9%)  | 2          | (1.8%)               | 4         | (4.3%)  |  |
| <b>Total</b> | <b>119</b> |                     | <b>93</b> |         | <b>114</b> |                     | <b>68</b> |         | <b>111</b> |                      | <b>93</b> |         |  |
|              |            | UP (p.value=0.933)  |           |         |            | RES (p.value=0.856) |           |         |            | DOWN (p.value=0.379) |           |         |  |
|              |            | Pre                 |           | Post    |            | Pre                 |           | Post    |            | Pre                  |           | Post    |  |
| <b>End</b>   | 3          | (2.5%)              | 2         | (2.2%)  | 3          | (2.5%)              | 2         | (2.2%)  | 3          | (2.7%)               | 2         | (2.2%)  |  |
| <b>Exo</b>   | 12         | (10.1%)             | 12        | (12.9%) | 12         | (10.1%)             | 12        | (12.9%) | 11         | (9.9%)               | 10        | (10.8%) |  |
| <b>Nat</b>   | 83         | (69.7%)             | 63        | (67.7%) | 83         | (69.7%)             | 63        | (67.7%) | 71         | (64%)                | 68        | (73.1%) |  |
| <b>Nrud</b>  | 21         | (17.6%)             | 16        | (17.2%) | 21         | (17.6%)             | 16        | (17.2%) | 26         | (23.4%)              | 13        | (14%)   |  |
| <b>Total</b> | <b>119</b> |                     | <b>93</b> |         | <b>119</b> |                     | <b>93</b> |         | <b>111</b> |                      | <b>93</b> |         |  |
|              |            | UP (p.value=0.993)  |           |         |            | RES (p.value=0.693) |           |         |            | DOWN (p.value=0.524) |           |         |  |
|              |            | Pre                 |           | Post    |            | Pre                 |           | Post    |            | Pre                  |           | Post    |  |
| <b>Hel</b>   | 19         | (16%)               | 14        | (15.1%) | 21         | (18.4%)             | 9         | (13.2%) | 20         | (18%)                | 16        | (17.2%) |  |
| <b>Hyd</b>   | 7          | (5.9%)              | 6         | (6.5%)  | 5          | (4.4%)              | 5         | (7.4%)  | 9          | (8.1%)               | 4         | (4.3%)  |  |
| <b>Hyg</b>   | 42         | (35.3%)             | 32        | (34.4%) | 44         | (38.6%)             | 28        | (41.2%) | 42         | (37.8%)              | 43        | (46.2%) |  |
| <b>Ter</b>   | 51         | (42.9%)             | 41        | (44.1%) | 44         | (38.6%)             | 26        | (38.2%) | 40         | (36%)                | 30        | (32.3%) |  |
| <b>Total</b> | <b>119</b> |                     | <b>93</b> |         | <b>114</b> |                     | <b>68</b> |         | <b>111</b> |                      | <b>93</b> |         |  |
